# Supplementary material for: ZIF-8 derived carbon (C-ZIF) as a bifunctional electron acceptor and HER cocatalyst for g-C3N4: construction of a metal-free, all carbon-based photocatalytic system for efficient hydrogen evolution
Source: Royal Society of Chemistry journal article supplement (doi:10.1039/c6ta00497k), 2016-01-01
Supplement: c6ta00497k1.pdf [file c6ta00497k1.pdf]

Electronic Supplementary Information

**ZIF-8 derived carbon (C-ZIF) as bifunctional electron acceptor and  
HER cocatalyst for g-C<sub>3</sub>N<sub>4</sub>: Construction of a metal-free, all carbon-  
based photocatalytic system for efficient hydrogen evolution**

Fang He,<sup>a,b</sup> Gang Chen,<sup>\*a</sup> Yansong Zhou,<sup>a</sup> Yaoguang Yu,<sup>a</sup> Laiquan Li,<sup>b</sup> Sue Hao,<sup>a</sup> and  
Bin Liu<sup>\*b</sup>

*<sup>a</sup>Department of Chemistry, Harbin Institute of Technology, Harbin 150001, P.R.  
China*

*<sup>b</sup>School of Chemical and Biomedical Engineering, Nanyang Technological University,  
Singapore 637459, Singapore*

\*Corresponding author: gchen@hit.edu.cn (G.C.); liubin@ntu.edu.sg (B.L.)

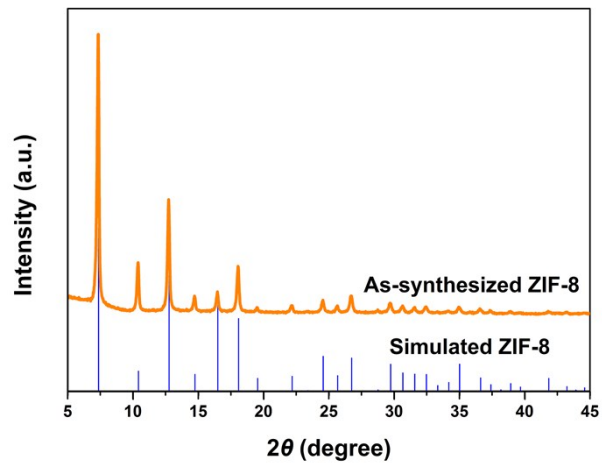

**Fig. S1** XRD pattern of as-synthesized ZIF-8.

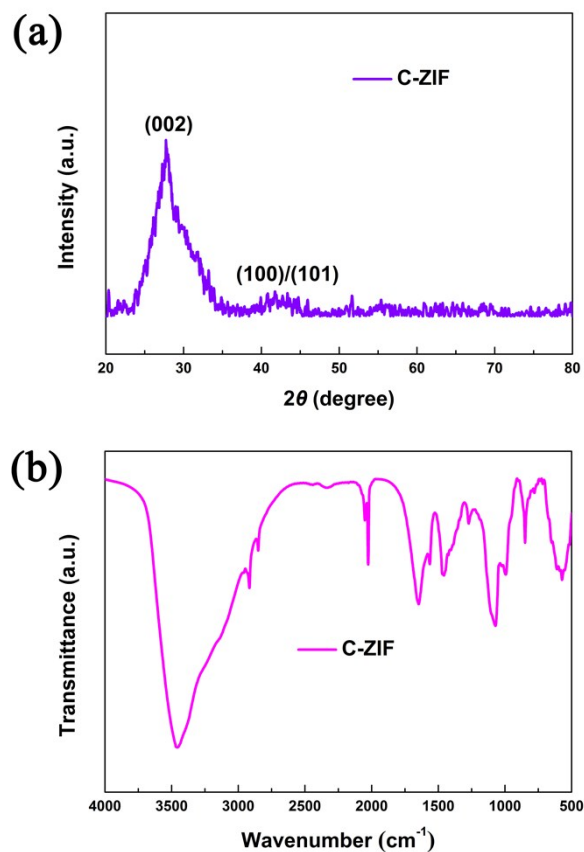

**Fig. S2** (a) XRD pattern and (b) FT-IR spectra of C-ZIF.

**Note:** FT-IR spectrum of carbonized ZIF-8 (C-ZIF) indicates the formation of condensed C–N/C=N bonds, along with the presence of N–H bond. The carbon (C-ZIF) networks formed along with the decomposition of ZIF-8 occurring, which has been illustrated in the previous literature,<sup>1</sup> and can be demonstrated as follows:

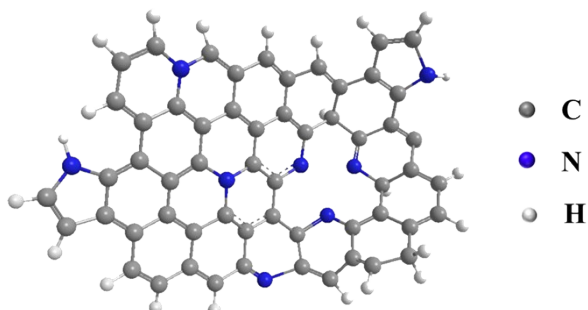

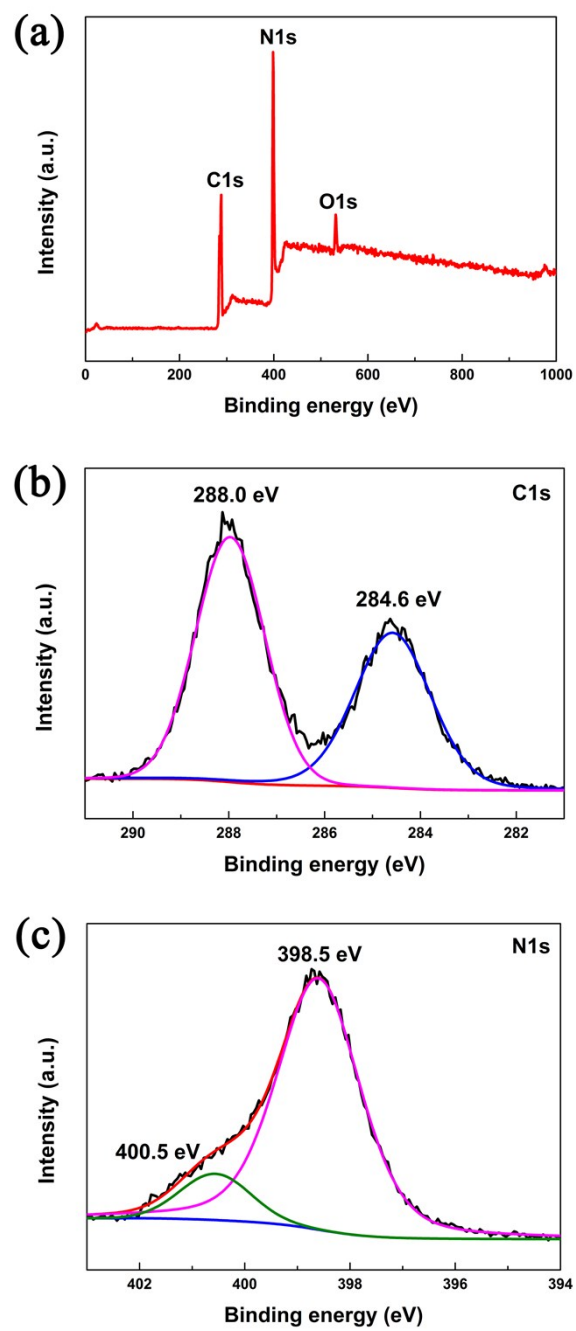

**Fig. S3** XPS survey spectra (a), high-resolution XPS spectra of (b) C 1s, and (c) N 1s for 1 wt% C-ZIF/g-C<sub>3</sub>N<sub>4</sub> composite.

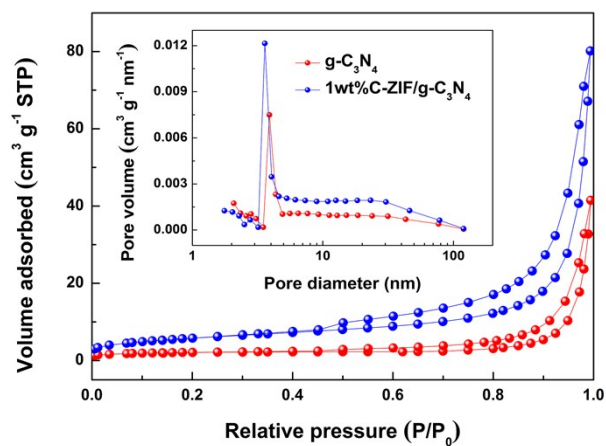

**Fig. S4** Nitrogen adsorption-desorption isotherms and the corresponding pore size distribution curves (inset) of g-C<sub>3</sub>N<sub>4</sub> and 1 wt% C-ZIF/g-C<sub>3</sub>N<sub>4</sub> composite.

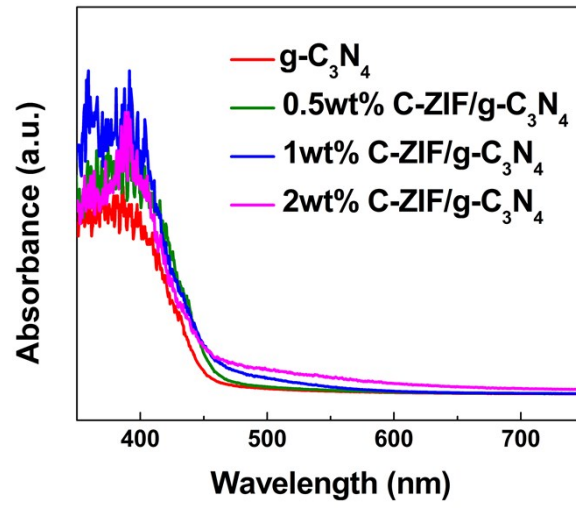

**Fig. S5** UV-vis absorption spectra of g-C<sub>3</sub>N<sub>4</sub> and C-ZIF/g-C<sub>3</sub>N<sub>4</sub> composites with different C-ZIF contents.

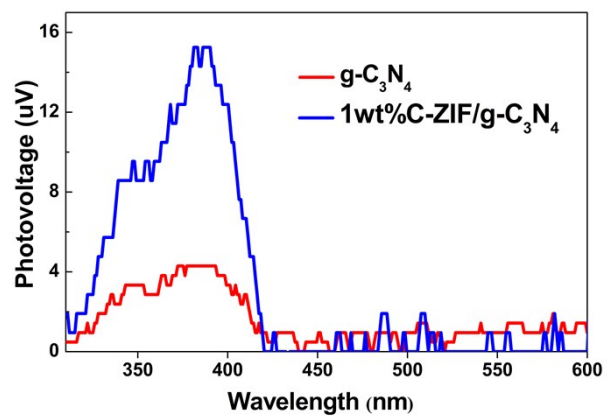

**Fig. S6** SPV spectra of pure g-C<sub>3</sub>N<sub>4</sub> and 1 wt% C-ZIF/g-C<sub>3</sub>N<sub>4</sub> composite

**Table S1** Radiative fluorescence lifetimes and their relative percentages of photoexcited charge carriers in the g-C<sub>3</sub>N<sub>4</sub> and 1wt% C-ZIF/g-C<sub>3</sub>N<sub>4</sub> composite.

| Sample                                      | $\tau_1$ (ns)–Rel. % | $\tau_2$ (ns)–Rel. % |
|---------------------------------------------|----------------------|----------------------|
| g-C <sub>3</sub> N <sub>4</sub>             | 1.27–54.71           | 9.33–45.29           |
| 1 wt% C-ZIF/g-C <sub>3</sub> N <sub>4</sub> | 2.39–61.78           | 13.93–38.22          |



## Reference

1. H. X. Zhong, J. Wang, Y. W. Zhang, W. L. Xu, W. Xing, D. Xu, Y. F. Zhang, X. B. Zhang, *Angew. Chem. Int. Ed.* **2014**, *53*, 14235-14239.
